# Supplementary material for: From Normal to Obesity and Back: The Associations between Mitochondrial DNA Copy Number, Gender, and Body Mass Index
Source: PubMed Central journal article supplement (PMC6562937; doi:10.3390/cells8050430), 2019-05-09
Supplement: cells-08-00430-s001.pdf [file cells-08-00430-s001.pdf]

**Supplementary Materials:**

**Table S1.** The level of incretin and ghrelin hormones in patients after LSG and RYGB bariatric operations, [Me(Q1 - Q3)]

| Sample          | Control group 1 (Healthy donors) | Control group 2 (Patients with obesity without T2DM) | Patients with T2DM before LSG                     | Patients with T2DM after LSG                        | Patients with T2DM before RYGB                   | Patients with T2DM after RYGB                                                 |
|-----------------|----------------------------------|------------------------------------------------------|---------------------------------------------------|-----------------------------------------------------|--------------------------------------------------|-------------------------------------------------------------------------------|
| Group           | 1                                | 2                                                    | 3                                                 | 4                                                   | 5                                                | 6                                                                             |
| Ghrelin (pg/mL) | 81.14 (57.04 – 98.8)             | 57.1 (41.01 – 83.5)                                  | 203.38 (52.5 – 551.7)                             | 85.01 (49.68 – 158.02)<br>p <sub>3-4</sub> =0.043 * | 127.2 (101.08 – 347.2)                           | 113.6 (62.0 – 166.5)                                                          |
| GIP (pg/mL)     | 39.6 (24.2 – 48.1)               | 42.3 (27.2 – 54.5)                                   | 107.64 (61.4 – 117.7)<br>p <sub>1-3</sub> <0.01 * | 54.53 (37.37 – 86.85)<br>p <sub>1-4</sub> =0.017 *  | 115.3 (52.7 – 183.3)<br>p <sub>1-5</sub> <0.01 * | 186.6 (173.5 – 229.5)<br>p <sub>1-6</sub> <0.01 *<br>p <sub>5-6</sub> =0.028* |
| GLP-1 (pg/mL)   | 13.2 (11.1 – 15.08)              | 5.14 (4.54 – 15.47)<br>p <sub>1-2</sub> =0.043 *     | 68.77 (39.27 – 79.26)<br>p <sub>1-3</sub> <0.01 * | 41.46 (20.58 – 149.9)<br>p <sub>1-4</sub> =0.01 *   | 49.2 (27.8 – 68.8)<br>p <sub>1-5</sub> <0.01 *   | 58.0 (48.6 – 63.5)                                                            |

Note: \* - (p<0.05), differences at a significance level were determined using the Wilcoxon test for two dependent samples and Mann-Whitney criterion for two independent samples

**Table S2.** The level of superfamily TNF receptors in patients after LSG and RYGB bariatric operations, [Me(Q1 - Q3)].

| Sample         | Control group 1 (Healthy donors) | Control group 2 (Patients with obesity without T2DM) | Patients with T2DM before LSG                      | Patients with T2DM after LSG                                                                              | Patients with T2DM before RYGB                                                  | Patients with T2DM after RYGB                                                                             |
|----------------|----------------------------------|------------------------------------------------------|----------------------------------------------------|-----------------------------------------------------------------------------------------------------------|---------------------------------------------------------------------------------|-----------------------------------------------------------------------------------------------------------|
| Group          | 1                                | 2                                                    | 3                                                  | 4                                                                                                         | 5                                                                               | 6                                                                                                         |
| sTNFR1 (ng/mL) | 112.7 (94.8 – 159.4)             | 257.4 (130.4 – 361.4)<br>p <sub>1-2</sub> =0.018 *   | 120.05 (80.6 – 138.0)<br>p <sub>2-3</sub> =0.008 * | 49.2 (31.9 – 70.7)<br>p <sub>1-4</sub> <0.001 *<br>p <sub>2-4</sub> <0.001 *<br>p <sub>3-4</sub> =0.012 * | 105.9 (66.05 – 141.3)<br>p <sub>2-5</sub> =0.002 *<br>p <sub>3-5</sub> =0.009 * | 45.1 (30.5 – 73.2)<br>p <sub>1-6</sub> <0.001 *<br>p <sub>2-6</sub> <0.001 *<br>p <sub>5-6</sub> =0.007 * |
| sTNFR2 (ng/mL) | 58.3 (44.1 – 73.2)               | 146.5 (87.1 – 179.3)<br>p <sub>1-2</sub> =0.01 *     | 104.6 (48.3 – 155.3)                               | 43.02 (30.8 – 62.7)<br>p <sub>2-4</sub> =0.001 *<br>p <sub>3-4</sub> =0.038 *                             | 72.5 (66.4 – 120.4)<br>p <sub>2-5</sub> =0.007 *<br>p <sub>3-5</sub> =0.023 *   | 49.8 (32.4 – 74.7)<br>p <sub>2-6</sub> <0.001 *<br>p <sub>5-6</sub> =0.026 *                              |

Note: \* - (p<0.05), differences at a significance level were determined using the Wilcoxon test for two dependent samples and Mann-Whitney criterion for two independent samples
